# Supplementary material for: On the Retrieval of the Water Quality Parameters from Sentinel-3/2 and Landsat-8 OLI in the Nile Delta’s Coastal and Inland Waters
Source: MDPI journal article supplement (doi:10.3390/w14040593), 2022-02-15
Supplement: s1 [file s1]

Archive with 1 entries (1 files):
- water-1562579-supplementary.pdf
