# Supplementary material for: On the Retrieval of the Water Quality Parameters from Sentinel-3/2 and Landsat-8 OLI in the Nile Delta’s Coastal and Inland Waters
Source: MDPI journal article supplement (doi:10.3390/w14040593), 2022-02-15
Supplement: s1 [file s1 › water-1562579-supplementary.pdf]

Supplementary data to the article titled “On the Retrieval of the Water Quality Parameters from Sentinel-3/2 and Landsat-8 OLI in the Nile Delta's Coastal and Inland waters”

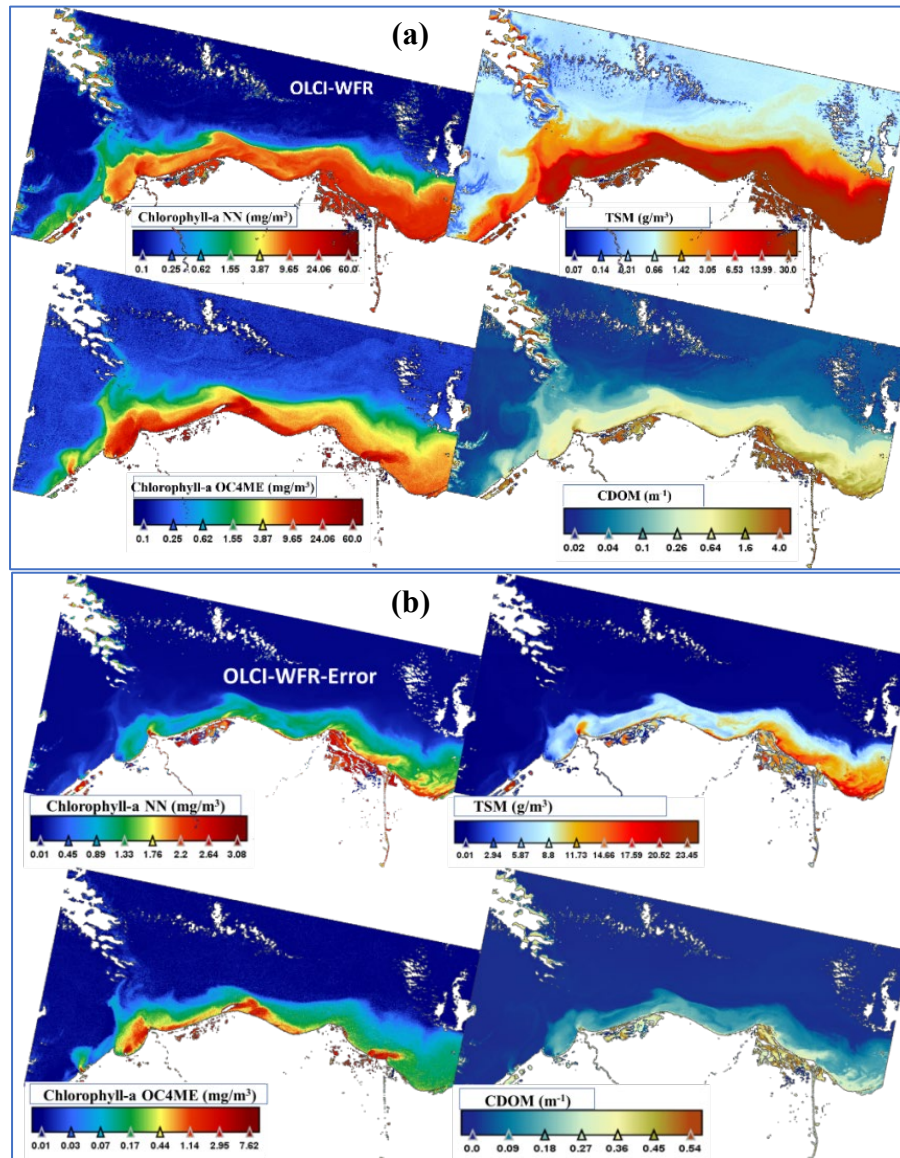

**Figure S1:** Retrieved water color parameters of a) Chl-*a*, TSM, and CDOM from S3 OCLI (WFR), and b) their associated errors.

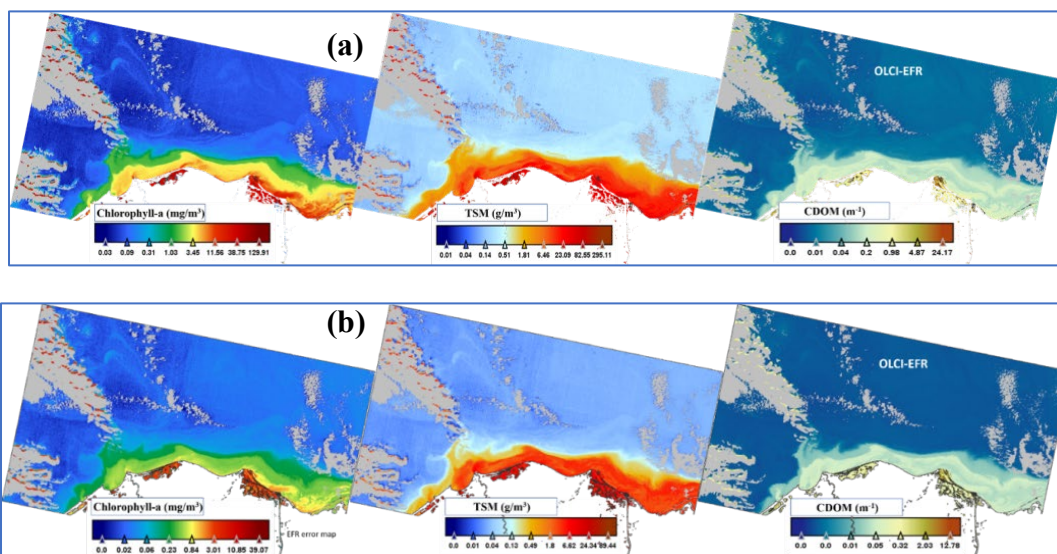

**Figure S2.** Retrieved water color parameters of a) Chl-*a*, TSM, and CDOM from S3 OCLI (EFR), and b) associated errors.

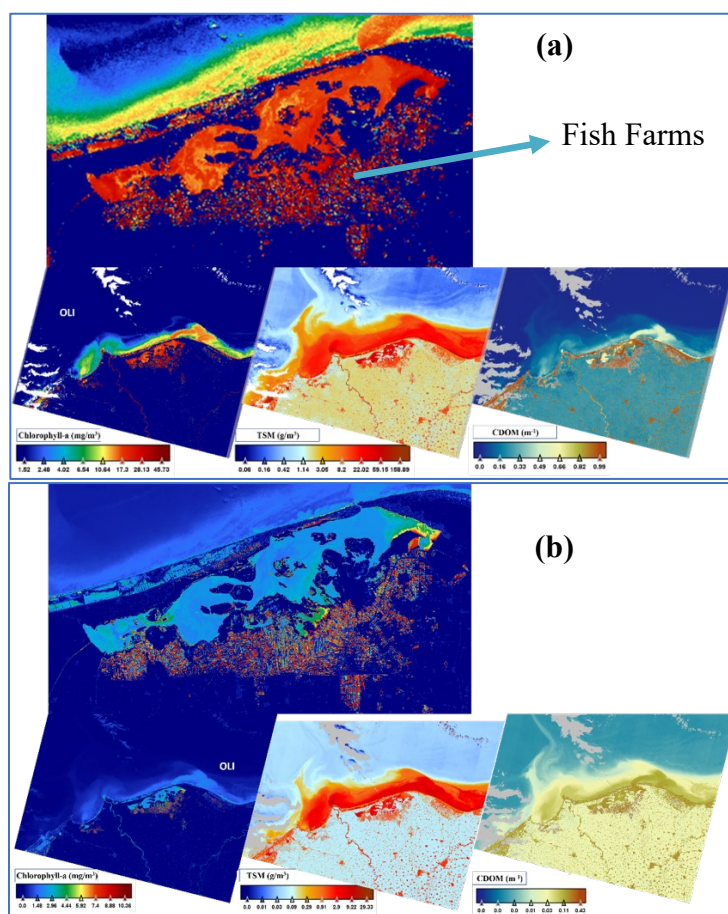

**Figure S3.** Retrieved water color parameters of a) Chl-*a*, TSM, and CDOM from OLI, and b) and their associated errors.

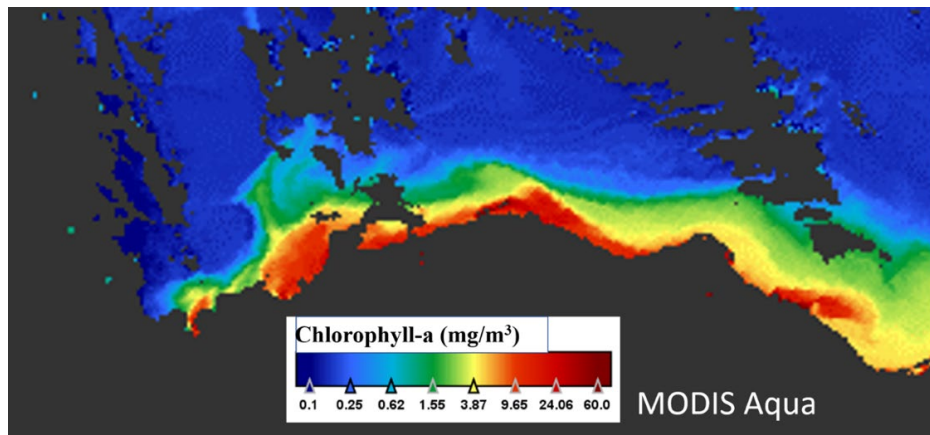

**Figure S4.** Retrieved Chl-*a* of the MODIS Aqua acquired on 11:14:59 Am in 22 March 2020.
